# Supplementary material for: Lentinan Protects against Nonalcoholic Fatty Liver Disease by Reducing Oxidative Stress and Apoptosis via the PPARα Pathway
Source: MDPI journal article supplement (doi:10.3390/metabo12010055), 2022-01-10
Supplement: s1 [file s1]

# Lentivan Protects against Nonalcoholic Fatty Liver Disease by Reducing Oxidative Stress and Apoptosis via the PPAR $\alpha$ Pathway

Tingyi Du <sup>1,2</sup>, Qin Fang <sup>1</sup>, Zhihao Zhang <sup>1</sup>, Chuanmeng Zhu <sup>1</sup>, Renfan Xu <sup>3</sup>, Guangzhi Chen <sup>1,\*</sup> and Yan Wang <sup>1,\*</sup>

<sup>1</sup> Division of Cardiology, Department of Internal Medicine, Tongji Hospital, Tongji Medical College, Huazhong University of Science and Technology, Wuhan 430030, China

<sup>2</sup> Department of Radiology, Zhongnan Hospital of Wuhan University, Wuhan 430071, China

<sup>3</sup> Department of Medical Ultrasound, Tongji Hospital, Tongji Medical College, Huazhong University of Science and Technology, Wuhan 430030, China

\* Correspondence: chengz2003@163.com (G.C.);

newswangyan@tjh.tjmu.edu.cn (Y.W.);

Tel./Fax: +86-27-6937-8422 (G.C. & Y.W.)

## Online supplemental data

## SUPPLEMENTAL TABLES

**Table S1.** List of antibodies.

| Antibody         | Company     | Catalog number |
|------------------|-------------|----------------|
| AMPK $\alpha$    | Abclonal    | A12718         |
| p-AMPK $\alpha$  | Abclonal    | AP0116         |
| BCL2             | Proteintech | No. 66799-1-Ig |
| BAX              | Proteintech | No. 60267-1-Ig |
| Caspase3         | Abclonal    | A2156          |
| cleaved-Caspase3 | Abclonal    | A19654         |
| CPT1 $\alpha$    | Abclonal    | A5307          |
| PPAR $\alpha$    | Abclonal    | A6697          |
| SOD1             | Abclonal    | A0274          |
| SOD2             | Abclonal    | A1340          |
| NOX2             | Abclonal    | A19701         |
| NOX4             | Abclonal    | A11274         |
| RXR $\alpha$     | Abclonal    | A19105         |

**Table S2.** List of *primer* sequences.

| Gene      | Sequences                      |
|-----------|--------------------------------|
| Ppara-F:  | 5' GGCAATGGCTTTATCACACG 3'     |
| Ppara-R:  | 5' TGTCATCCAGTTCTAAGGCATTG 3'  |
| Chrebp-F: | 5' CTCAACTCCATACAACCCTCG 3'    |
| Chrebp-R: | 5' CGTCGGTTCCTCCATCTTGTT 3'    |
| Srebp1-F: | 5' GTTTCGGGGAACTTTTCCT 3       |
| Srebp1-R: | 5' TGAGCTGGAGCATGTCTTCG 3'     |
| Cd36-F:   | 5' AGCAGTGATTTGACTTGTGGC 3'    |
| Cd36-R:   | 5' AAGGCTAGGAAACCATCCACC 3'    |
| Cpt1α-F:  | 5' GAGAATGCCAGGAGGTCATAGAG 3'  |
| Cpt1α-R:  | 5' AGTCTCTGTCCTCCCCCTCTCG 3'   |
| Pparγ-F:  | 5' ACCACTCGCATTCCTTTGACA 3'    |
| Pparγ-R:  | 5' TCGCACTTTGGTATTCTTGAG 3'    |
| Acat-F:   | 5' CATCCAAGGGGGTGAAGGAC 3'     |
| Acat -R:  | 5' GGTGTTGCTCCTCTGCTCAT 3'     |
| Apob-F:   | 5' TGCAGTCAACAGCAAGAGCA 3'     |
| Apob -R:  | 5' CCTCCATCCTGAGTTGGACA 3'     |
| Mttp-F:   | 5' AGAGCATCTTCCAGGGCAAA 3'     |
| Mttp -R:  | 5' TATGCCCACTGGCTCGTTTT 3'     |
| Lxr-F:    | 5' CAATGCCTGATGTTTCTCCTGAT 3'  |
| Lxr -R:   | 5' GCTCTGCTGACTCCAACCCTAT 3'   |
| Fxr-F:    | 5' ATTTACAGGCTACGGACGAGTTT 3'  |
| Fxr-R:    | 5' GTAGAAGCCCAGGTTGGAATAGTA 3' |
| Rxra-F:   | 5' CACATTGGGCTTCGGGACT 3'      |
| Rxra-R:   | 5' AGCGGTCCCCACAGATAGC 3'      |
| Sirt1-F:  | 5' AGCGGCTTGAGGGTAATCAA 3'     |
| Sirt1-R:  | 5' TTCGGGCCTCTCCGTATCAT 3'     |
| Gapdh-F:  | 5' CAAAATGGTGAAGGTCGGTGTG 3'   |
| Gapdh -R: | 5' TGATGTTAGTGGGGTCTCGCTC 3'   |
| Tnfα-F:   | 5' CAGGCGGTGCCTATGTCTC 3'      |
| Tnfα-R:   | 5' CGATCACCCCGAAGTTCAGTAG 3'   |
| Il-6-F:   | 5' TCTATACTACTTCACAAGTCGGA 3'  |
| Il-6-R:   | 5' GAATTGCCATTGCACAACCTCTT 3'  |
| Il-10-F:  | 5' CAGCCGGGAAGACAATAACT 3'     |
| Il-10-R:  | 5' GCATTAAGGAGTCGGTTAGCA 3'    |
| Fas-F:    | 5' GGAGGTGG TGATAGCCGGTAT 3'   |
| Fas-R:    | 5' TGGGTAATCCATAGAGCCCAG 3'    |

## SUPPLEMENTAL FIGURES

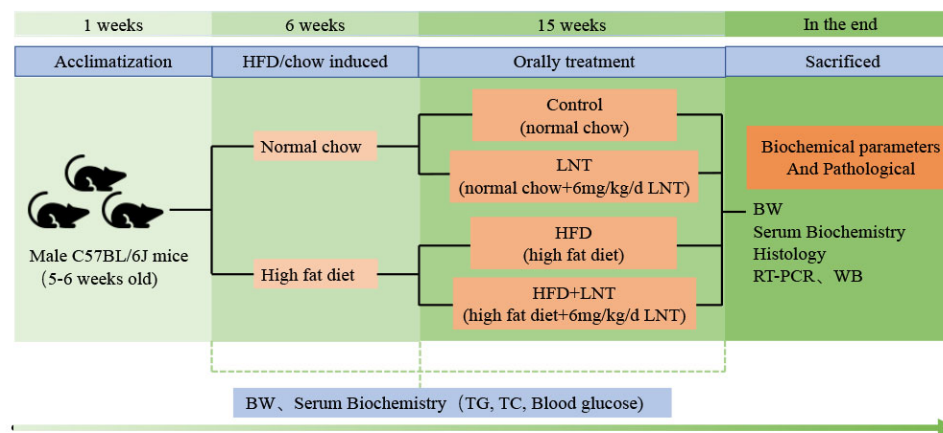

**Figure S1.** Flow chart of the animal experiment.

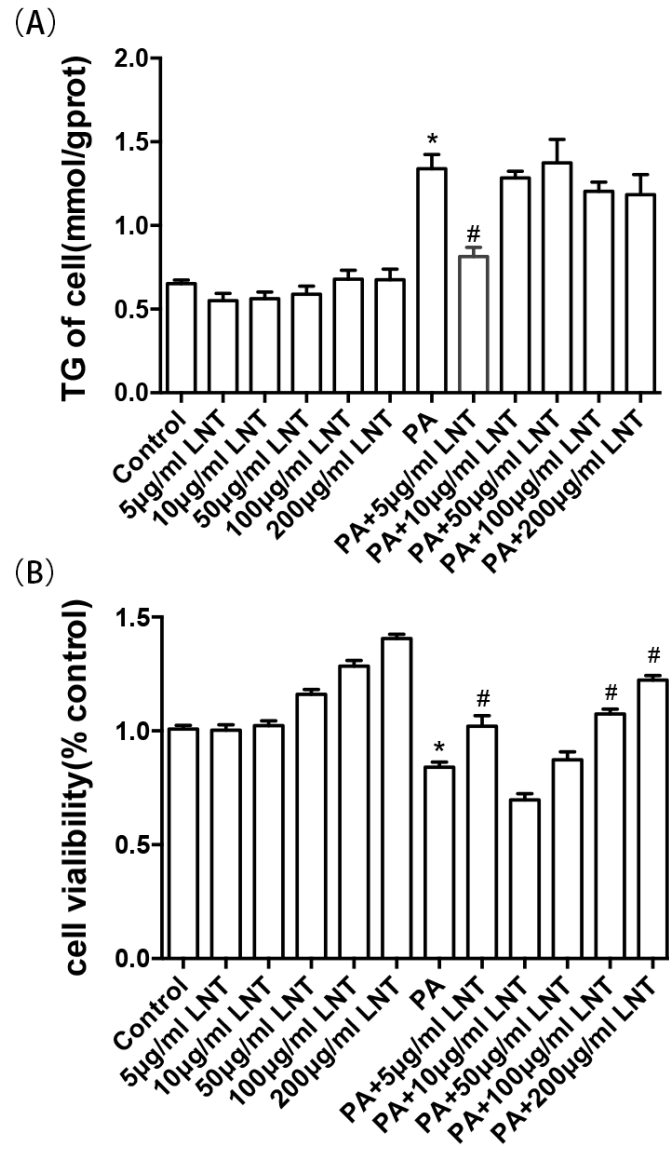

**Figure S2.** Effects of different concentrations of LNT in PA-induced AML12. **(A)** TG content and **(B)** cell viability in AML-12 cells by PA and different concentrations of LNT treatment. Data are presented as the mean  $\pm$  SEM ( $n = 3$  per group). \*  $p < 0.05$  compared with the Control group. #  $p < 0.05$  compared with the PA group.

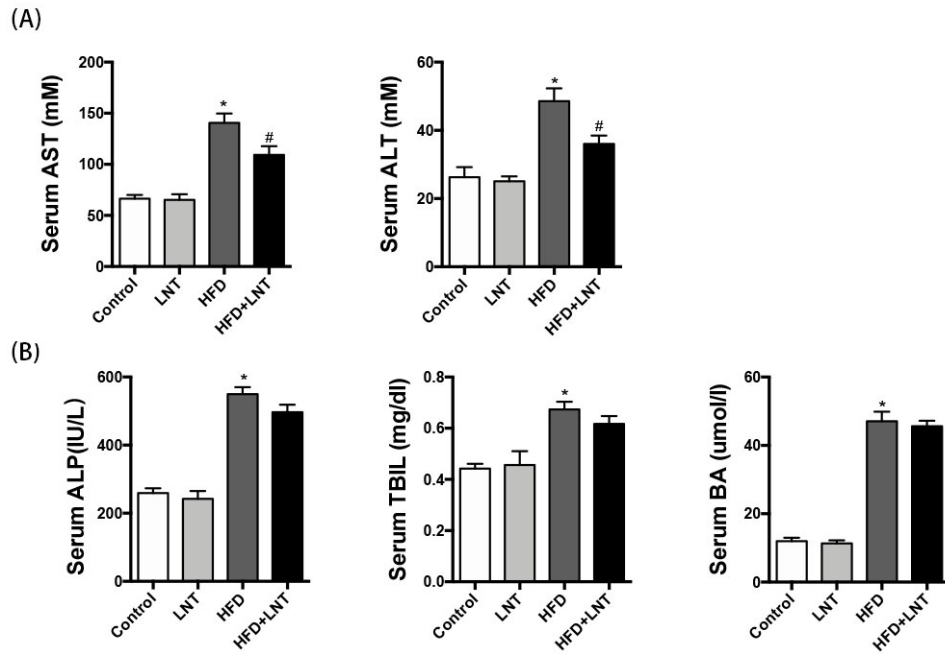

**Figure S3.** Effects of LNT on liver function in HFD-induced mice. (A) AST and ALT, and (B) ALP, TBIL, and BA levels in serum. Data are presented as the mean  $\pm$  SEM ( $n = 8$  per group). \* $p < 0.05$  compared with the Control group. # $p < 0.05$  compared with the HFD group.

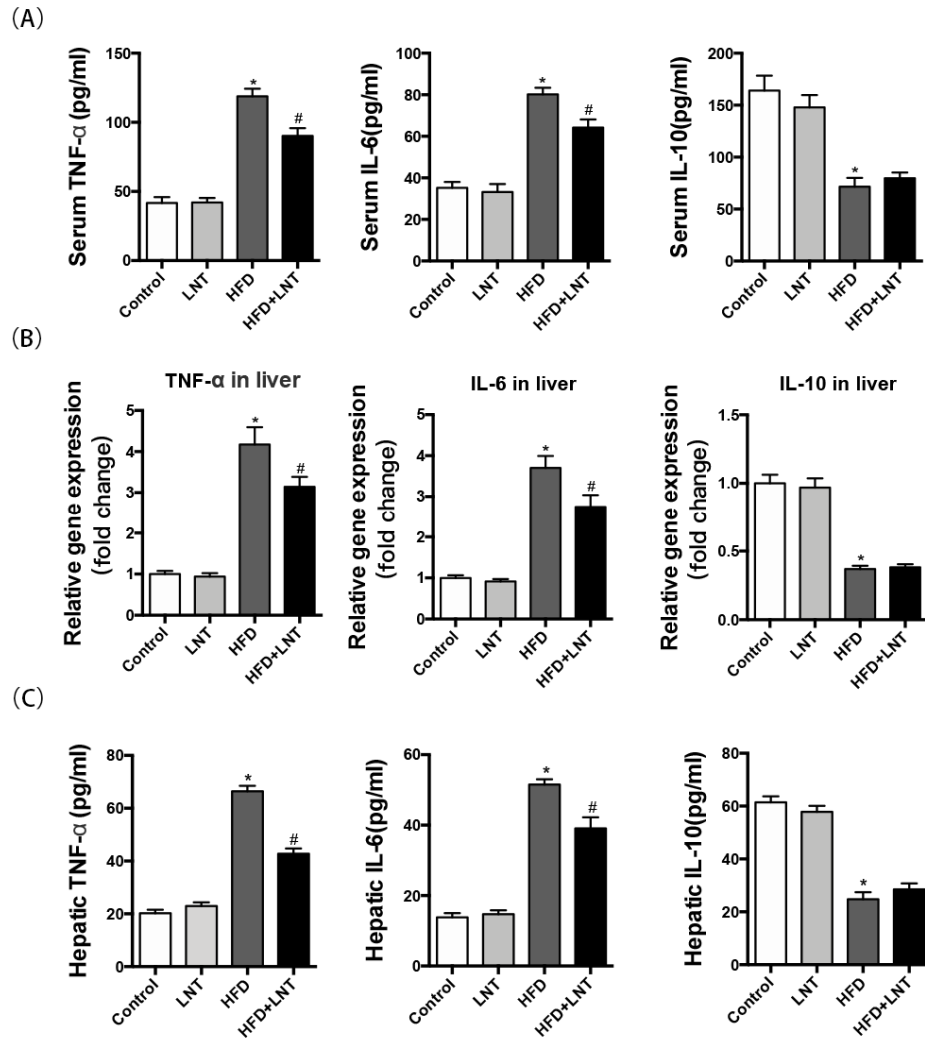

**Figure S4.** Effects of LNT on inflammatory cytokines in HFD-induced mice. (A) Serum levels of TNF- $\alpha$ , IL-6, and IL-10 in four groups of mice. (B) Hepatic mRNA and (C) protein levels of TNF- $\alpha$ , IL-6, and IL-10. Data are presented as the mean  $\pm$  SEM ( $n = 8$  per group). \*  $p < 0.05$  compared with the Control group. #  $p < 0.05$  compared with the HFD group.

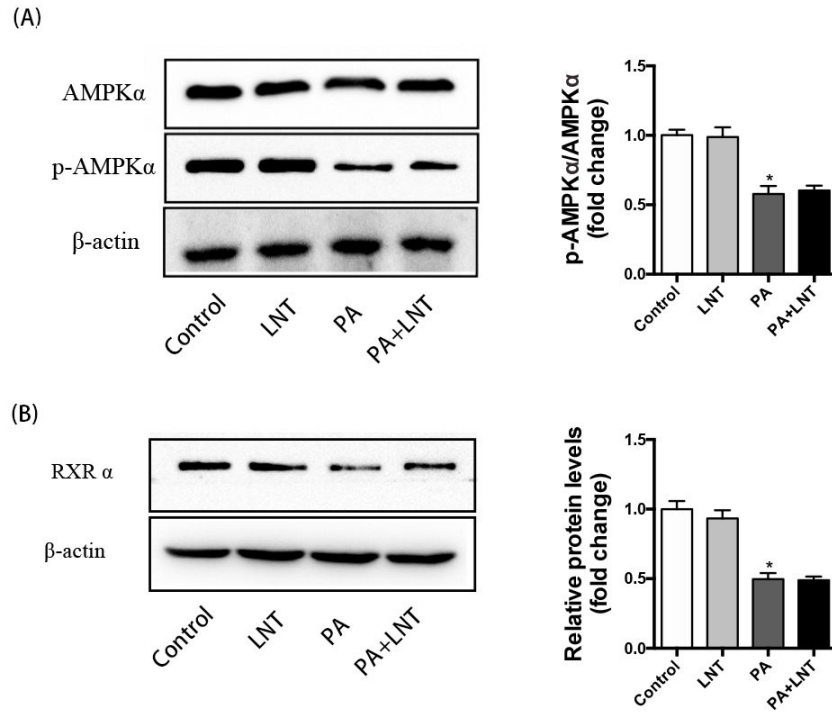

**Figure S5.** Effects of LNT on related genes in PA-induced AML12 cells. Representative Western blots and quantification of (A) AMPK $\alpha$ , p-AMPK $\alpha$  and (B) RXR $\alpha$  in AML-12 cells. Data are presented as the mean  $\pm$  SEM ( $n = 3$  per group). \* $p < 0.05$  compared with the Control group. # $p < 0.05$  compared with the PA group.
